# Supplementary material for: Predominantly Antibody-Deficient Patients With Non-infectious Complications Have Reduced Naive B, Treg, Th17, and Tfh17 Cells
Source: PubMed Central journal article supplement (PMC6873234; doi:10.3389/fimmu.2019.02593), 2019-11-15
Supplement: Data_Sheet_1.pdf [file Data_Sheet_1.pdf]

*Supplementary Materials*

**Supplementary Table 1. Composition of the antibody panels**

| tube          | fluorochrome |       |        |       |                |                 |             |               |                    |        |                       |
|---------------|--------------|-------|--------|-------|----------------|-----------------|-------------|---------------|--------------------|--------|-----------------------|
|               | BV421        | BV510 | BV605  | BV711 | FITC/<br>BB515 | PerCP-<br>Cy5.5 | PE          | PE-<br>Dazzle | PC7 /<br>PE-Cy7    | APC    | APC-H7 /<br>APC-Ax750 |
| 1. TruCount   | -            | -     | -      | -     | CD3            | CD45            | CD16 + CD56 | -             | CD4                | CD19   | CD8A                  |
| 2. B-cell     | CD27         | IgM   | CD38   | CD21  | IgE + IgA      | IgD             | IgG + IgA   | -             | CD19               | CD5    | CD24                  |
| 3. T-effector | CD27         | CD4   | CD45RA | CD3   | CD45RO         | CD28            | CD31        | CCR7          | TCR $\gamma\delta$ | HLA-DR | CD8A                  |
| 4. Th subset  | CD25         | CD4   | CD45RA | CD3   | CXCR5          | CCR6            | CXCR3       | CCR7          | CCR4               | CD127  | CD8A                  |

**Supplementary Table 2. Antibody list**

| Marker                | Fluorochrome   | Clone           | Source          | Cat. number | volume/<br>test (in $\mu$ l) | tube(s) |
|-----------------------|----------------|-----------------|-----------------|-------------|------------------------------|---------|
| CD3                   | FITC           | UCHT1           | BD Biosciences  | 555332      | 3                            | 1       |
| CD3                   | BV711          | UCHT1           | BD Biosciences  | 563725      | 2.5                          | 3, 4    |
| CD4                   | PC7            | SFC112T4D11     | Beckman Coulter | 6607101     | 0.2                          | 1       |
| CD4                   | BV510          | RPA-T4          | Biologend       | 300546      | 1.5                          | 3, 4    |
| CD5                   | APC            | UCHT2           | Biologend       | 300612      | 0.2                          | 2       |
| CD8A                  | APC-H7         | SK1             | BD Biosciences  | 560179      | 4                            | 1, 3, 4 |
| CD16                  | PE             | B73.1           | Biologend       | 360704      | 0.2                          | 1       |
| CD19                  | APC            | SJ25C1          | Biologend       | 363006      | 0.4                          | 1       |
| CD19                  | PE-CY7         | SJ25C1          | BD Biosciences  | 557835      | 5                            | 2       |
| CD21                  | BV711          | B-ly4           | BD Biosciences  | 563163      | 5                            | 2       |
| CD24                  | APC-Alexa750   | ALB9            | Beckman Coulter | B10738      | 2.5                          | 2       |
| CD25                  | BV421          | BC96            | Biologend       | 302630      | 2.5                          | 4       |
| CD27                  | BV421          | M-T271          | BD Biosciences  | 562513      | 1                            | 2, 3    |
| CD28                  | PerCP-Cy5.5    | CD28.2          | Biologend       | 302922      | 5                            | 3       |
| CD31                  | PE             | WM59            | BD Biosciences  | 555446      | 5                            | 3       |
| CD38                  | BV605          | HB7             | BD Biosciences  | 562665      | 0.2                          | 2       |
| CD45                  | PerCP-Cy5.5    | 2D1             | BD Biosciences  | 340953      | 2                            | 1       |
| CD45RA                | BV605          | HI100           | Biologend       | 304134      | 0.2                          | 3, 4    |
| CD45RO                | FITC           | UCHL1           | Biologend       | 304204      | 5                            | 3       |
| CD56                  | PE             | B159            | BD Biosciences  | 555516      | 5                            | 1       |
| CD127                 | APC            | A019D5          | Biologend       | 351316      | 5                            | 4       |
| CCR4                  | PE-CY7         | L291H4          | Biologend       | 359410      | 5                            | 4       |
| CCR6                  | PerCP-CY5.5    | G034E3          | Biologend       | 353406      | 2.5                          | 4       |
| CCR7                  | PE-Dazzle      | G043H7          | Biologend       | 353236      | 2.5                          | 3, 4    |
| *CCR7                 | PE-CF594       | 150503          | BD Biosciences  | 562381      | 5                            | 3, 4    |
| CXCR3                 | PE             | 1C6/CXCR3       | BD Biosciences  | 557185      | 20                           | 4       |
| CXCR5                 | BB515          | RF8B2           | BD Biosciences  | 564624      | 5                            | 4       |
| HLA-DR                | APC            | L243            | Biologend       | 307610      | 2                            | 3       |
| IgA                   | VioBright FITC | IS11-8E10       | Miltenyi Biotec | 130-104-726 | 0.5                          | 2       |
| IgA                   | PE             | IS11-8E10       | Miltenyi Biotec | 130-093-128 | 0.5                          | 2       |
| IgD                   | PerCP-Cy5.5    | IA6-2           | Biologend       | 348208      | 1.5                          | 2       |
| IgE                   | FITC           | goat polyclonal | Invitrogen      | H15701      | 1                            | 2       |
| IgG                   | PE             | G18-145         | BD Biosciences  | 555787      | 5                            | 2       |
| IgM                   | BV510          | MHM-88          | Biologend       | 314522      | 1                            | 2       |
| TCR $\gamma$ $\delta$ | PC7            | IMMU510         | Beckman Coulter | B10247      | 1                            | 3       |

\* alternative reagent

**Supplementary Table 3. Definition of leukocyte subsets**

| n=55                      | Population name                             | Phenotype definition                                                                                                                                                               |
|---------------------------|---------------------------------------------|------------------------------------------------------------------------------------------------------------------------------------------------------------------------------------|
| <b>Tube 1: Trucount</b>   |                                             |                                                                                                                                                                                    |
| 1                         | Granulocytes                                | SSC <sup>high</sup> CD45 <sup>+</sup>                                                                                                                                              |
| 2                         | Monocytes                                   | SSC <sup>inter</sup> CD45 <sup>+</sup>                                                                                                                                             |
| 3                         | Lymphocytes                                 | SSC <sup>low</sup> CD45 <sup>+</sup>                                                                                                                                               |
| 4                         | └ B cells                                   | SSC <sup>low</sup> CD45 <sup>+</sup> CD19 <sup>+</sup>                                                                                                                             |
| 5                         | └ NK cells                                  | SSC <sup>low</sup> CD45 <sup>+</sup> CD3 <sup>-</sup> CD16 <sup>+</sup> and/or CD56 <sup>+</sup>                                                                                   |
| 6                         | └ T cells                                   | SSC <sup>low</sup> CD45 <sup>+</sup> CD3 <sup>+</sup> CD16 <sup>-</sup> or CD56 <sup>-</sup>                                                                                       |
|                           | └ CD4 <sup>+</sup> T cells                  | SSC <sup>low</sup> CD45 <sup>+</sup> CD3 <sup>+</sup> CD16 <sup>-</sup> or CD56 <sup>-</sup> CD4 <sup>+</sup> CD8 <sup>-</sup>                                                     |
|                           | └ CD8 <sup>+</sup> T cells                  | SSC <sup>low</sup> CD45 <sup>+</sup> CD3 <sup>+</sup> CD16 <sup>-</sup> or CD56 <sup>-</sup> CD4 <sup>-</sup> CD8 <sup>+</sup>                                                     |
| <b>Tube 2: B cells</b>    |                                             |                                                                                                                                                                                    |
|                           | B cells                                     | FSC <sup>low</sup> SSC <sup>low</sup> CD19 <sup>+</sup>                                                                                                                            |
| 7                         | transitional B cells                        | FSC <sup>low</sup> SSC <sup>low</sup> CD19 <sup>+</sup> CD38 <sup>hi</sup> CD27 <sup>-</sup>                                                                                       |
| 8                         | plasmablasts                                | FSC <sup>low</sup> SSC <sup>low</sup> CD19 <sup>+</sup> CD38 <sup>hi</sup> CD27 <sup>+</sup>                                                                                       |
| 9                         | CD21 <sup>lo</sup> B cells                  | FSC <sup>low</sup> SSC <sup>low</sup> CD19 <sup>+</sup> CD38 <sup>low</sup> CD21 <sup>lo</sup>                                                                                     |
|                           | CD21 <sup>+</sup> B cells                   | FSC <sup>low</sup> SSC <sup>low</sup> CD19 <sup>+</sup> CD38 <sup>low</sup> CD21 <sup>+</sup>                                                                                      |
|                           | └ CD21 <sup>+</sup> CD27 <sup>-</sup>       | FSC <sup>low</sup> SSC <sup>low</sup> CD19 <sup>+</sup> CD38 <sup>low</sup> CD21 <sup>+</sup> CD27 <sup>-</sup>                                                                    |
| 10                        | └ naive B cells                             | FSC <sup>low</sup> SSC <sup>low</sup> CD19 <sup>+</sup> CD38 <sup>low</sup> CD21 <sup>+</sup> CD27 <sup>-</sup> IgM <sup>+</sup> IgD <sup>+/-</sup>                                |
| 11                        | └ pre-naive                                 | FSC <sup>low</sup> SSC <sup>low</sup> CD19 <sup>+</sup> CD38 <sup>low</sup> CD21 <sup>+</sup> CD27 <sup>-</sup> IgM <sup>+</sup> IgD <sup>+/-</sup> CD5 <sup>+</sup>               |
| 12                        | └ naive/mature                              | FSC <sup>low</sup> SSC <sup>low</sup> CD19 <sup>+</sup> CD38 <sup>low</sup> CD21 <sup>+</sup> CD27 <sup>-</sup> IgM <sup>+</sup> IgD <sup>+/-</sup> CD5 <sup>-</sup>               |
|                           | └ CD27 <sup>-</sup> Memory                  | FSC <sup>low</sup> SSC <sup>low</sup> CD19 <sup>+</sup> CD38 <sup>low</sup> CD21 <sup>+</sup> CD27 <sup>-</sup> IgM <sup>+</sup> IgD <sup>-</sup>                                  |
| 13                        | └ IgG <sup>+</sup> CD27 <sup>-</sup> memory | FSC <sup>low</sup> SSC <sup>low</sup> CD19 <sup>+</sup> CD38 <sup>low</sup> CD21 <sup>+</sup> CD27 <sup>-</sup> IgM <sup>+</sup> IgD <sup>-</sup> IgG <sup>+</sup>                 |
| 14                        | └ IgA <sup>+</sup> CD27 <sup>-</sup> memory | FSC <sup>low</sup> SSC <sup>low</sup> CD19 <sup>+</sup> CD38 <sup>low</sup> CD21 <sup>+</sup> CD27 <sup>-</sup> IgM <sup>+</sup> IgD <sup>-</sup> IgA <sup>+</sup>                 |
|                           | └ IgE <sup>+</sup> CD27 <sup>-</sup> memory | FSC <sup>low</sup> SSC <sup>low</sup> CD19 <sup>+</sup> CD38 <sup>low</sup> CD21 <sup>+</sup> CD27 <sup>-</sup> IgM <sup>+</sup> IgD <sup>-</sup> IgE <sup>+</sup>                 |
|                           | └ CD21 <sup>+</sup> CD27 <sup>+</sup>       | FSC <sup>low</sup> SSC <sup>low</sup> CD19 <sup>+</sup> CD38 <sup>low</sup> CD21 <sup>+</sup> CD27 <sup>+</sup>                                                                    |
| 15                        | └ natural effector                          | FSC <sup>low</sup> SSC <sup>low</sup> CD19 <sup>+</sup> CD38 <sup>low</sup> CD21 <sup>+</sup> CD27 <sup>+</sup> IgM <sup>+</sup> IgD <sup>+</sup>                                  |
| 16                        | └ IgM only                                  | FSC <sup>low</sup> SSC <sup>low</sup> CD19 <sup>+</sup> CD38 <sup>low</sup> CD21 <sup>+</sup> CD27 <sup>+</sup> IgM <sup>+</sup> IgD <sup>-</sup>                                  |
| 17                        | └ IgG <sup>+</sup> CD27 <sup>+</sup> memory | FSC <sup>low</sup> SSC <sup>low</sup> CD19 <sup>+</sup> CD38 <sup>low</sup> CD21 <sup>+</sup> CD27 <sup>+</sup> IgM <sup>+</sup> IgD <sup>-</sup> IgA <sup>+</sup>                 |
| 18                        | └ IgA <sup>+</sup> CD27 <sup>+</sup> memory | FSC <sup>low</sup> SSC <sup>low</sup> CD19 <sup>+</sup> CD38 <sup>low</sup> CD21 <sup>+</sup> CD27 <sup>+</sup> IgM <sup>+</sup> IgD <sup>-</sup> IgA <sup>+</sup>                 |
|                           | └ IgE <sup>+</sup> CD27 <sup>+</sup> memory | FSC <sup>low</sup> SSC <sup>low</sup> CD19 <sup>+</sup> CD38 <sup>low</sup> CD21 <sup>+</sup> CD27 <sup>+</sup> IgM <sup>+</sup> IgD <sup>-</sup> IgE <sup>+</sup>                 |
| <b>Tube 3: T effector</b> |                                             |                                                                                                                                                                                    |
|                           | T cells                                     | FSC <sup>low</sup> SSC <sup>low</sup> CD3 <sup>+</sup>                                                                                                                             |
| 19                        | γδ <sup>+</sup> T cells                     | FSC <sup>low</sup> SSC <sup>low</sup> CD3 <sup>+</sup> γδ <sup>+</sup>                                                                                                             |
|                           | γδ <sup>-</sup> T cells                     | FSC <sup>low</sup> SSC <sup>low</sup> CD3 <sup>+</sup> γδ <sup>-</sup>                                                                                                             |
| 20                        | └ CD4 T cells                               | FSC <sup>low</sup> SSC <sup>low</sup> CD3 <sup>+</sup> γδ <sup>-</sup> CD4 <sup>+</sup> CD8 <sup>-</sup>                                                                           |
| 21                        | └ CD4 Tnaive                                | FSC <sup>low</sup> SSC <sup>low</sup> CD3 <sup>+</sup> γδ <sup>-</sup> CD4 <sup>+</sup> CD8 <sup>-</sup> CCR7 <sup>+</sup> CD45RO <sup>-</sup>                                     |
| 22                        | └ CD4 Tcm                                   | FSC <sup>low</sup> SSC <sup>low</sup> CD3 <sup>+</sup> γδ <sup>-</sup> CD4 <sup>+</sup> CD8 <sup>-</sup> CCR7 <sup>+</sup> CD45RO <sup>+</sup>                                     |
| 23                        | └ CD4 TemRO                                 | FSC <sup>low</sup> SSC <sup>low</sup> CD3 <sup>+</sup> γδ <sup>-</sup> CD4 <sup>+</sup> CD8 <sup>-</sup> CCR7 <sup>-</sup> CD45RO <sup>+</sup>                                     |
| 24                        | └ CD4 early TemRO                           | FSC <sup>low</sup> SSC <sup>low</sup> CD3 <sup>+</sup> γδ <sup>-</sup> CD4 <sup>+</sup> CD8 <sup>-</sup> CCR7 <sup>-</sup> CD45RO <sup>+</sup> CD27 <sup>+</sup> CD28 <sup>+</sup> |
| 25                        | └ CD4 intermediate TemRO                    | FSC <sup>low</sup> SSC <sup>low</sup> CD3 <sup>+</sup> γδ <sup>-</sup> CD4 <sup>+</sup> CD8 <sup>-</sup> CCR7 <sup>-</sup> CD45RO <sup>+</sup> CD27 <sup>-</sup> CD28 <sup>+</sup> |
| 26                        | └ CD4 late TemRO                            | FSC <sup>low</sup> SSC <sup>low</sup> CD3 <sup>+</sup> γδ <sup>-</sup> CD4 <sup>+</sup> CD8 <sup>-</sup> CCR7 <sup>-</sup> CD45RO <sup>+</sup> CD27 <sup>-</sup> CD28 <sup>-</sup> |
| 27                        | └ CD4 TemRA                                 | FSC <sup>low</sup> SSC <sup>low</sup> CD3 <sup>+</sup> γδ <sup>-</sup> CD4 <sup>+</sup> CD8 <sup>-</sup> CCR7 <sup>-</sup> CD45RO <sup>-</sup>                                     |
| 28                        | └ CD4 early TemRA                           | FSC <sup>low</sup> SSC <sup>low</sup> CD3 <sup>+</sup> γδ <sup>-</sup> CD4 <sup>+</sup> CD8 <sup>-</sup> CCR7 <sup>-</sup> CD45RO <sup>-</sup> CD27 <sup>+</sup> CD28 <sup>+</sup> |
| 29                        | └ CD4 intermediate TemRA                    | FSC <sup>low</sup> SSC <sup>low</sup> CD3 <sup>+</sup> γδ <sup>-</sup> CD4 <sup>+</sup> CD8 <sup>-</sup> CCR7 <sup>-</sup> CD45RO <sup>-</sup> CD27 <sup>-</sup> CD28 <sup>+</sup> |
| 30                        | └ CD4 late TemRA                            | FSC <sup>low</sup> SSC <sup>low</sup> CD3 <sup>+</sup> γδ <sup>-</sup> CD4 <sup>+</sup> CD8 <sup>-</sup> CCR7 <sup>-</sup> CD45RO <sup>-</sup> CD27 <sup>-</sup> CD28 <sup>-</sup> |
| 31                        | └ CD8 T cells                               | FSC <sup>low</sup> SSC <sup>low</sup> CD3 <sup>+</sup> γδ <sup>-</sup> CD4 <sup>-</sup> CD8 <sup>+</sup>                                                                           |
| 32                        | └ CD8 Tnaive                                | FSC <sup>low</sup> SSC <sup>low</sup> CD3 <sup>+</sup> γδ <sup>-</sup> CD4 <sup>-</sup> CD8 <sup>+</sup> CCR7 <sup>+</sup> CD45RO <sup>-</sup>                                     |
| 33                        | └ CD8 Tcm                                   | FSC <sup>low</sup> SSC <sup>low</sup> CD3 <sup>+</sup> γδ <sup>-</sup> CD4 <sup>-</sup> CD8 <sup>+</sup> CCR7 <sup>+</sup> CD45RO <sup>+</sup>                                     |
| 34                        | └ CD8 TemRO                                 | FSC <sup>low</sup> SSC <sup>low</sup> CD3 <sup>+</sup> γδ <sup>-</sup> CD4 <sup>-</sup> CD8 <sup>+</sup> CCR7 <sup>-</sup> CD45RO <sup>+</sup>                                     |
| 35                        | └ CD8 early TemRO                           | FSC <sup>low</sup> SSC <sup>low</sup> CD3 <sup>+</sup> γδ <sup>-</sup> CD4 <sup>-</sup> CD8 <sup>+</sup> CCR7 <sup>-</sup> CD45RO <sup>+</sup> CD27 <sup>+</sup> CD28 <sup>+</sup> |
| 36                        | └ CD8 intermediate TemRO                    | FSC <sup>low</sup> SSC <sup>low</sup> CD3 <sup>+</sup> γδ <sup>-</sup> CD4 <sup>-</sup> CD8 <sup>+</sup> CCR7 <sup>-</sup> CD45RO <sup>+</sup> CD27 <sup>-</sup> CD28 <sup>+</sup> |
| 37                        | └ CD8 late TemRO                            | FSC <sup>low</sup> SSC <sup>low</sup> CD3 <sup>+</sup> γδ <sup>-</sup> CD4 <sup>-</sup> CD8 <sup>+</sup> CCR7 <sup>-</sup> CD45RO <sup>+</sup> CD27 <sup>-</sup> CD28 <sup>-</sup> |
| 38                        | └ CD8 TemRA                                 | FSC <sup>low</sup> SSC <sup>low</sup> CD3 <sup>+</sup> γδ <sup>-</sup> CD4 <sup>-</sup> CD8 <sup>+</sup> CCR7 <sup>-</sup> CD45RO <sup>-</sup>                                     |
| 39                        | └ CD8 early TemRA                           | FSC <sup>low</sup> SSC <sup>low</sup> CD3 <sup>+</sup> γδ <sup>-</sup> CD4 <sup>-</sup> CD8 <sup>+</sup> CCR7 <sup>-</sup> CD45RO <sup>-</sup> CD27 <sup>+</sup> CD28 <sup>+</sup> |
| 40                        | └ CD8 intermediate TemRA                    | FSC <sup>low</sup> SSC <sup>low</sup> CD3 <sup>+</sup> γδ <sup>-</sup> CD4 <sup>-</sup> CD8 <sup>+</sup> CCR7 <sup>-</sup> CD45RO <sup>-</sup> CD27 <sup>-</sup> CD28 <sup>+</sup> |
| 41                        | └ CD8 late TemRA                            | FSC <sup>low</sup> SSC <sup>low</sup> CD3 <sup>+</sup> γδ <sup>-</sup> CD4 <sup>-</sup> CD8 <sup>+</sup> CCR7 <sup>-</sup> CD45RO <sup>-</sup> CD27 <sup>-</sup> CD28 <sup>-</sup> |
| <b>Tube 4: Th subset</b>  |                                             |                                                                                                                                                                                    |
|                           | T Cells                                     | FSC <sup>low</sup> SSC <sup>low</sup> CD3 <sup>+</sup>                                                                                                                             |

|    |                  |                                                                                                                                                                                                                                 |
|----|------------------|---------------------------------------------------------------------------------------------------------------------------------------------------------------------------------------------------------------------------------|
|    | CD8 T Cells      | FSC <sup>low</sup> SSC <sup>low</sup> CD3 <sup>+</sup> CD4 <sup>-</sup> CD8 <sup>+</sup>                                                                                                                                        |
| 42 | └ CD8 Tfh Cells  | FSC <sup>low</sup> SSC <sup>low</sup> CD3 <sup>+</sup> CD4 <sup>-</sup> CD8 <sup>+</sup> CXCR5 <sup>+</sup> CD45RA <sup>-</sup>                                                                                                 |
|    | CD4 T Cells      | FSC <sup>low</sup> SSC <sup>low</sup> CD3 <sup>+</sup> CD4 <sup>+</sup> CD8 <sup>-</sup>                                                                                                                                        |
| 43 | └ Treg cells     | FSC <sup>low</sup> SSC <sup>low</sup> CD3 <sup>+</sup> CD4 <sup>+</sup> CD8 <sup>-</sup> CD25 <sup>+</sup> CD127 <sup>lo/-</sup>                                                                                                |
| 44 | └ naive Treg     | FSC <sup>low</sup> SSC <sup>low</sup> CD3 <sup>+</sup> CD4 <sup>+</sup> CD8 <sup>-</sup> CD25 <sup>+</sup> CD127 <sup>lo</sup> CCR4 <sup>+</sup> CD45RA <sup>+</sup>                                                            |
| 45 | └ memory Treg    | FSC <sup>low</sup> SSC <sup>low</sup> CD3 <sup>+</sup> CD4 <sup>+</sup> CD8 <sup>-</sup> CD25 <sup>+</sup> CD127 <sup>lo</sup> CCR4 <sup>-</sup> CD45RA <sup>-</sup>                                                            |
| 46 | └ CD4 Tfr        | FSC <sup>low</sup> SSC <sup>low</sup> CD3 <sup>+</sup> CD4 <sup>+</sup> CD8 <sup>-</sup> CD25 <sup>+</sup> CD127 <sup>lo</sup> CXCR5 <sup>+</sup> CD45RA <sup>-</sup>                                                           |
|    | └ Non-Treg cells | FSC <sup>low</sup> SSC <sup>low</sup> CD3 <sup>+</sup> CD4 <sup>+</sup> CD8 <sup>-</sup> CD25 <sup>-</sup> CD127 <sup>lo/hi</sup>                                                                                               |
|    | └ Th Cells       | FSC <sup>low</sup> SSC <sup>low</sup> CD3 <sup>+</sup> CD4 <sup>+</sup> CD8 <sup>-</sup> CD25 <sup>-</sup> CD127 <sup>lo/hi</sup> CXCR5 <sup>-</sup> CD45RA <sup>-</sup>                                                        |
|    | └ CCR6- Th       | FSC <sup>low</sup> SSC <sup>low</sup> CD3 <sup>+</sup> CD4 <sup>+</sup> CD8 <sup>-</sup> CD25 <sup>-</sup> CD127 <sup>lo/hi</sup> CXCR5 <sup>-</sup> CD45RA <sup>-</sup> CCR6 <sup>-</sup>                                      |
| 47 | └ Th1            | FSC <sup>low</sup> SSC <sup>low</sup> CD3 <sup>+</sup> CD4 <sup>+</sup> CD8 <sup>-</sup> CD25 <sup>-</sup> CD127 <sup>lo/hi</sup> CXCR5 <sup>-</sup> CD45RA <sup>-</sup> CCR6 <sup>-</sup> CCR4 <sup>-</sup> CXCR3 <sup>+</sup> |
| 48 | └ Th2            | FSC <sup>low</sup> SSC <sup>low</sup> CD3 <sup>+</sup> CD4 <sup>+</sup> CD8 <sup>-</sup> CD25 <sup>-</sup> CD127 <sup>lo/hi</sup> CXCR5 <sup>-</sup> CD45RA <sup>-</sup> CCR6 <sup>-</sup> CCR4 <sup>+</sup> CXCR3 <sup>-</sup> |
|    | └ CCR6+ Th       | FSC <sup>low</sup> SSC <sup>low</sup> CD3 <sup>+</sup> CD4 <sup>+</sup> CD8 <sup>-</sup> CD25 <sup>-</sup> CD127 <sup>lo/hi</sup> CXCR5 <sup>-</sup> CD45RA <sup>-</sup> CCR6 <sup>+</sup>                                      |
| 49 | └ Th17           | FSC <sup>low</sup> SSC <sup>low</sup> CD3 <sup>+</sup> CD4 <sup>+</sup> CD8 <sup>-</sup> CD25 <sup>-</sup> CD127 <sup>lo/hi</sup> CXCR5 <sup>-</sup> CD45RA <sup>-</sup> CCR6 <sup>+</sup> CCR4 <sup>+</sup> CXCR3 <sup>-</sup> |
| 50 | └ Th17.1         | FSC <sup>low</sup> SSC <sup>low</sup> CD3 <sup>+</sup> CD4 <sup>+</sup> CD8 <sup>-</sup> CD25 <sup>-</sup> CD127 <sup>lo/hi</sup> CXCR5 <sup>-</sup> CD45RA <sup>-</sup> CCR6 <sup>+</sup> CCR4 <sup>-</sup> CXCR3 <sup>+</sup> |
| 51 | └ Tfh Cells      | FSC <sup>low</sup> SSC <sup>low</sup> CD3 <sup>+</sup> CD4 <sup>+</sup> CD8 <sup>-</sup> CD25 <sup>-</sup> CD127 <sup>lo/hi</sup> CXCR5 <sup>+</sup> CD45RA <sup>-</sup>                                                        |
|    | └ CCR6- Tfh      | FSC <sup>low</sup> SSC <sup>low</sup> CD3 <sup>+</sup> CD4 <sup>+</sup> CD8 <sup>-</sup> CD25 <sup>-</sup> CD127 <sup>lo/hi</sup> CXCR5 <sup>+</sup> CD45RA <sup>-</sup> CCR6 <sup>-</sup>                                      |
| 52 | └ Tfh1           | FSC <sup>low</sup> SSC <sup>low</sup> CD3 <sup>+</sup> CD4 <sup>+</sup> CD8 <sup>-</sup> CD25 <sup>-</sup> CD127 <sup>lo/hi</sup> CXCR5 <sup>+</sup> CD45RA <sup>-</sup> CCR6 <sup>-</sup> CCR4 <sup>-</sup> CXCR3 <sup>+</sup> |
| 53 | └ Tfh2           | FSC <sup>low</sup> SSC <sup>low</sup> CD3 <sup>+</sup> CD4 <sup>+</sup> CD8 <sup>-</sup> CD25 <sup>-</sup> CD127 <sup>lo/hi</sup> CXCR5 <sup>+</sup> CD45RA <sup>-</sup> CCR6 <sup>-</sup> CCR4 <sup>+</sup> CXCR3 <sup>-</sup> |
|    | └ CCR6+ Tfh      | FSC <sup>low</sup> SSC <sup>low</sup> CD3 <sup>+</sup> CD4 <sup>+</sup> CD8 <sup>-</sup> CD25 <sup>-</sup> CD127 <sup>lo/hi</sup> CXCR5 <sup>+</sup> CD45RA <sup>-</sup> CCR6 <sup>+</sup>                                      |
| 54 | └ Tfh17          | FSC <sup>low</sup> SSC <sup>low</sup> CD3 <sup>+</sup> CD4 <sup>+</sup> CD8 <sup>-</sup> CD25 <sup>-</sup> CD127 <sup>lo/hi</sup> CXCR5 <sup>+</sup> CD45RA <sup>-</sup> CCR6 <sup>+</sup> CCR4 <sup>+</sup> CXCR3 <sup>-</sup> |
| 55 | └ Tfh17.1        | FSC <sup>low</sup> SSC <sup>low</sup> CD3 <sup>+</sup> CD4 <sup>+</sup> CD8 <sup>-</sup> CD25 <sup>-</sup> CD127 <sup>lo/hi</sup> CXCR5 <sup>+</sup> CD45RA <sup>-</sup> CCR6 <sup>+</sup> CCR4 <sup>-</sup> CXCR3 <sup>+</sup> |

---

**Supplementary Table 4. Flowcytometer set-up**

| LSRFortessa X-20 |        | LSR-II and LSRFortessa |        | Fluorochromes used in this study |
|------------------|--------|------------------------|--------|----------------------------------|
| <b>355 nm</b>    |        | -                      |        | -                                |
| 379/28           | No LP  | -                      | -      | -                                |
| 525/50           | 505 LP | -                      | -      | -                                |
| 740/35           | 690 LP | -                      | -      | -                                |
| <b>405 nm</b>    |        | <b>405 nm</b>          |        |                                  |
| 450/50           | No LP  | 450/50                 | No LP  | BV421                            |
| 525/50           | 505 LP | 525/50                 | 505 LP | BV510                            |
| -                | -      | 586/15                 | 570 LP | -                                |
| 610/20           | 600 LP | 610/20                 | 600 LP | BV605                            |
| 670/30           | 635 LP | 660/20                 | 630 LP | -                                |
| 710/50           | 685 LP | 710/50                 | 685 LP | BV711                            |
| 780/60           | 750 LP | 780/60                 | 750 LP | -                                |
| <b>488 nm</b>    |        | <b>488 nm</b>          |        |                                  |
| 488/10           | No LP  | 488/10                 | No LP  | SSC                              |
| 530/30           | 505 LP | 530/30                 | 505 LP | FITC, BB515, VioBright FITC      |
| 710/50           | 685 LP | 710/50                 | 630 LP | PerCP-Cy5.5                      |
| <b>561 nm</b>    |        | <b>561 nm</b>          |        |                                  |
| 586/15           | No LP  | 582/15                 | No LP  | PE                               |
| 610/20           | 600 LP | 610/20                 | 600 LP | PE-Dazzle                        |
| 675/50           | 635 LP | 685/35                 | 635 LP | -                                |
| 780/60           | 750 LP | 780/60                 | 750 LP | PE-Cy7, PC7                      |
| <b>640 nm</b>    |        | <b>633 nm</b>          |        |                                  |
| 670/30           | No LP  | 670/14                 | No LP  | APC                              |
| 730/45           | 690 LP | 730/45                 | 690 LP | Fixable Viability Stain 700      |
| 780/60           | 750 LP | 780/60                 | 750 LP | APC-H7, APC-Alexa750             |

**Supplementary Table 5. Target values for 7<sup>th</sup> peak of rainbow beads in fluorescent channels**

| <b>Fluorochrome</b> | <b>Channel</b> | Lower (-15%) | <b>Target MFI</b> | Upper (+15%) | recommendation |
|---------------------|----------------|--------------|-------------------|--------------|----------------|
| <b>BV421</b>        | <b>V450</b>    | 100,452      | <b>118,178</b>    | 135,905      | EuroFlow       |
| <b>BV510</b>        | <b>V525</b>    | 93,871       | <b>110,436</b>    | 127,002      | EuroFlow       |
| <b>BV605</b>        | <b>V610</b>    | 47,731       | <b>56,154</b>     | 64,577       | In-house       |
| <b>BV711</b>        | <b>V710</b>    | 15,079       | <b>17,740</b>     | 20,401       | In-house       |
| <b>FITC, BB515</b>  | <b>B530</b>    | 28,752       | <b>33,826</b>     | 38,900       | EuroFlow       |
| <b>PerCP-Cy5.5</b>  | <b>B710</b>    | 66,846       | <b>78,642</b>     | 90,438       | EuroFlow       |
| <b>PE</b>           | <b>YG586</b>   | 32,381       | <b>38,095</b>     | 43,809       | EuroFlow       |
| <b>PE-Dazzle</b>    | <b>YG610</b>   | 178,500      | <b>210,000</b>    | 241,500      | In-house       |
| <b>PE-Cy7</b>       | <b>YG780</b>   | 8,316        | <b>9,783</b>      | 11,250       | EuroFlow       |
| <b>APC</b>          | <b>R670</b>    | 158,639      | <b>186,634</b>    | 214,629      | EuroFlow       |
| <b>AF700</b>        | <b>R730</b>    | 121,550      | <b>143,000</b>    | 164,450      | In-house       |
| <b>APC-H7</b>       | <b>R780</b>    | 64,194       | <b>75,522</b>     | 86,850       | EuroFlow       |

Spherotech Rainbow Calibration particles (8 peaks) 3.41µm; cat nr. RCP-30-5A, Lot No. EAG01

Supplementary Table 6: Clinical and immunological details of all patients

| Patient | Age at inclusion (yr) | Age at diagnosis (yr) | Sex | Clinical Diagnosis | IgRT at time of sampling | anti-inflammatory within 4-6 months prior to sampling | B-cells/ $\mu$ l blood | T-cells/ $\mu$ l blood | IgG at inclusion (g/L) | IgA (g/L) | IgM (g/L) | Impaired vaccination responses | Infectious complications                                                                     | Non-infectious complications                                        | NIC at diagnosis |
|---------|-----------------------|-----------------------|-----|--------------------|--------------------------|-------------------------------------------------------|------------------------|------------------------|------------------------|-----------|-----------|--------------------------------|----------------------------------------------------------------------------------------------|---------------------------------------------------------------------|------------------|
| 1       | 18                    | 2/12                  | M   | XLA                | Y                        | N                                                     | <1                     | <u>3148</u>            | N/A                    | N/A       | N/A       | N/A                            | sinusitis                                                                                    | none                                                                | N/A              |
| 2       | 21                    | 3/12                  | M   | XLA                | Y                        | N                                                     | <1                     | 1652                   | 12*                    | 0.1       | 0.1       | N/A                            | pneumonia, bronchiectasis                                                                    | none                                                                | N/A              |
| 3       | 22                    | 3/12                  | M   | XLA                | Y                        | N                                                     | <1                     | 1770                   | N/A                    | <0.1      | <0.1      | N/A                            | otitis, sinusitis, pneumonia                                                                 | none                                                                | N/A              |
| 4       | 24                    | 13                    | M   | XLA                | Y                        | N                                                     | 10                     | 1401                   | N/A                    | 0.1       | 0.1       | N/A                            | sinusitis, bronchiectasis, prostatitis                                                       | none                                                                | N/A              |
| 5       | 24                    | 2                     | M   | XLA                | Y                        | N                                                     | <0.1                   | 1497                   | N/A                    | <0.1      | <0.1      | N/A                            | otitis, sinusitis, pneumonia                                                                 | leukemia^                                                           | N/A              |
| 6       | 26                    | 1                     | M   | XLA                | Y                        | N                                                     | <0.1                   | <u>2478</u>            | N/A                    | <0.1      | <0.1      | N/A                            | otitis, sinusitis, pneumonia, bronchiectasis                                                 | none                                                                | N/A              |
| 7       | 34                    | 12                    | M   | XLA                | Y                        | N                                                     | 1                      | 625                    | N/A                    | <0.1      | <0.1      | N/A                            | otitis, sinusitis, pneumonia                                                                 | none                                                                | N/A              |
| 8       | 49                    | 12                    | M   | XLA                | Y                        | N                                                     | 3                      | 801                    | N/A                    | 0.1       | 0.1       | N/A                            | otitis, sinusitis, pneumonia, bronchiectasis                                                 | none                                                                | N/A              |
| 9       | 59                    | 5                     | M   | XLA                | Y                        | HCT                                                   | <0.1                   | <u>3141</u>            | N/A                    | <0.1      | <0.1      | N/A                            | otitis, sinusitis, pneumonia, asthma/COPD, bronchiectasis                                    | none                                                                | N/A              |
| 10      | 24                    | 18                    | F   | agamma             | N <sup>#</sup>           | N                                                     | 10                     | 998                    | 0.6                    | 0.1       | 0.1       | N/A                            | otitis, sinusitis, pneumonia                                                                 | none                                                                | N/A              |
| 11      | 23                    | 23                    | M   | CVID               | Y                        | N                                                     | 446                    | 1422                   | 4.9                    | 0.3       | 0.3       | N/A                            | sinusitis                                                                                    | ITP/ AIHA/ Neutropenia/ Splenomegaly                                | Y                |
| 12      | 23                    | 22                    | F   | CVID               | Y                        | N                                                     | 215                    | 1339                   | 4.4                    | 0.2       | 0.4       | N/A                            | otitis, sinusitis                                                                            | enteropathy                                                         | Y                |
| 13      | 24                    | 24                    | M   | CVID               | N <sup>#</sup>           | N                                                     | 228                    | 954                    | 1.1                    | <0.1      | <0.1      | not done                       | otitis, sinusitis, pneumonia, VZV                                                            | none                                                                | N/A              |
| 14      | 24                    | 23                    | F   | CVID               | Y                        | N                                                     | 17                     | 736                    | <1.4                   | <0.2      | <0.2      | not done                       | pneumonia, sinusitis                                                                         | arthritis, enteropathy - duodenal and ilea tetralogy of Fallot/ VSD | Y                |
| 15      | 25                    | 12                    | M   | CVID               | Y                        | N                                                     | 106                    | <u>2562</u>            | 1.9                    | 0.1       | 0.4       | N/A                            | otitis, sinusitis, pneumonia, bronchiectasis                                                 | arthritis                                                           | Y                |
| 16      | 25                    | 22                    | M   | CVID               | Y                        | N                                                     | 230                    | 1381                   | 2.2                    | <0.1      | 0.1       | N/A                            | sinusitis, pneumonia                                                                         | none                                                                | N/A              |
| 17      | 26                    | 15                    | M   | CVID               | Y                        | N                                                     | 467                    | <u>3355</u>            | 5.6                    | 0.6       | 0.3       | pneumo                         | sinusitis                                                                                    | vitiligo                                                            | Y                |
| 18      | 27                    | 27                    | F   | CVID               | Y                        | N                                                     | 166                    | 2008                   | 3.9                    | 0.7       | 0.3       | N/A                            | pneumonia, bronchitis                                                                        | pulmonary nodules and colitis                                       | N                |
| 19      | 28                    | 28                    | M   | CVID               | N <sup>#</sup>           | N                                                     | 56                     | 819                    | 3.3                    | 1         | 0.4       | not done                       | bronchitis, pneumonia                                                                        | cytopenia                                                           | Y                |
| 20      | 30                    | 28                    | F   | CVID               | Y                        | N                                                     | <u>1089</u>            | <u>2953</u>            | 2.2                    | 0.4       | 0.6       | N/A                            | sinusitis                                                                                    | GLILD                                                               | Y                |
| 21      | 34                    | 34                    | F   | CVID               | N <sup>#</sup>           | N                                                     | 46                     | 1083                   | <1                     | <0.1      | <0.1      | N/A                            | otitis, sinusitis, pneumonia, bronchiectasis                                                 | enteropathy                                                         | N                |
| 22      | 35                    | 30                    | F   | CVID               | Y                        | N                                                     | 222                    | 646                    | 2                      | 0.1       | 0.1       | pneumo                         | sinusitis, giardia, asthma/COPD                                                              | granuloma, enteropathy                                              | N                |
| 23      | 37                    | 24                    | M   | CVID               | Y                        | N                                                     | 78                     | 981                    | 4.1                    | 0.1       | 0.4       | pneumo, Hib                    | otitis, sinusitis, pneumonia, systemic viral infection, giardia, asthma/COPD, bronchiectasis | granuloma, enteropathy                                              | N                |
| 24      | 41                    | 31                    | M   | CVID               | Y                        | -                                                     | 35                     | 1107                   | 2.6                    | 0.2       | 0.2       | pneumo                         | sinusitis, pneumonia, systemic viral infection                                               | granuloma, enteropathy                                              | Y                |
| 25      | 43                    | 35                    | F   | CVID               | Y                        | -                                                     | 101                    | 1242                   | 2                      | 0.3       | 0.2       | pneumo                         | sinusitis, pneumonia                                                                         | cytopenia                                                           | Y                |
| 26      | 44                    | 36                    | F   | CVID               | Y                        | -                                                     | 177                    | 614                    | 2.7                    | 0.1       | 0.1       | pneumo                         | sinusitis, pneumonia, giardia                                                                | splenomegaly, enteropathy                                           | N                |

| Patient | Age at inclusion (yr) | Age at diagnosis (yr) | Sex | Clinical Diagnosis | IgRT at time of sampling | anti-inflammatory within 4-6 months prior to sampling | B-cells/ $\mu$ l blood | T-cells/ $\mu$ l blood | IgG at inclusion (g/L) | IgA (g/L) | IgM (g/L) | Impaired vaccination responses   | Infectious complications                                                    | Non-infectious complications                                     | NIC at diagnosis |
|---------|-----------------------|-----------------------|-----|--------------------|--------------------------|-------------------------------------------------------|------------------------|------------------------|------------------------|-----------|-----------|----------------------------------|-----------------------------------------------------------------------------|------------------------------------------------------------------|------------------|
| 27      | 44                    | 43                    | M   | CVID               | Y                        | –                                                     | 91                     | 834                    | 0.6                    | 0         | 0.2       | N/A                              | sinusitis, pneumonia, bronchiectasis                                        | splenomegaly, lymphadenopathy, granuloma, enteropathy, arthritis | Y                |
| 28      | 46                    | 40                    | F   | CVID               | Y                        | –                                                     | 180                    | 818                    | 3                      | 0.5       | 0.4       | pneumo                           | otitis, sinusitis, shingles                                                 | urticaria                                                        | N                |
| 29      | 46                    | 41                    | M   | CVID               | Y                        | –                                                     | 228                    | 870                    | 0.6                    | 0.1       | 0.1       | pneumo                           | otitis, sinusitis                                                           | none                                                             | N/A              |
| 30      | 47                    | 40                    | F   | CVID               | Y                        | –                                                     | 84                     | 1210                   | 3.1                    | <0.1      | <0.1      | N/A                              | sinusitis, bronchitis, conjunctivitis                                       | autoimmune hypothyroidism, collagenous colitis                   | N                |
| 31      | 52                    | 52                    | F   | CVID               | N <sup>#</sup>           | PNL                                                   | 138                    | 1214                   | 4.8                    | 0.8       | 1.4       | pneumo                           | otitis, sinusitis, pneumonia                                                | none                                                             | N/A              |
| 32      | 53                    | 53                    | F   | CVID               | Y                        | PNL                                                   | 96                     | 678                    | 3.8                    | 0.9       | 0.8       | N/A                              | bronchitis, sinusitis                                                       | pericarditis                                                     | Y                |
| 33      | 54                    | 16                    | F   | CVID               | N <sup>#</sup>           | –                                                     | 373                    | 1473                   | 5.4                    | 1.6       | 0.3       | pneumo                           | bronchiectasis, sinusitis                                                   | hypothyroidism                                                   | Y                |
| 34      | 54                    | 54                    | F   | CVID               | Y                        | –                                                     | 95                     | 631                    | 11*                    | 0.2       | 0.4       | N/A                              | viral pneumonia, otitis                                                     | none                                                             | N/A              |
| 35      | 54                    | 45                    | M   | CVID               | Y                        | –                                                     | 245                    | 775                    | 2                      | <0.1      | 0.1       | N/A                              | sinusitis, pneumonia, asthma/COPD, bronchiectasis                           | none                                                             | N/A              |
| 36      | 54                    | 46                    | M   | CVID               | Y                        | –                                                     | 152                    | 1040                   | 4.4                    | 0.2       | 1         | pneumo, diphtheria, tetanus, Hib | sinusitis, pneumonia                                                        | solid organ malignancy                                           | N                |
| 37      | 56                    | 44                    | M   | CVID               | Y                        | PNL                                                   | 86                     | 235                    | 11.7*                  | <0.1      | 0.2       | N/A                              | pneumonia, hepatitis, colitis                                               | AIHA, ITP, marked splenomegaly                                   | Y                |
| 38      | 62                    | 59                    | F   | CVID               | N                        | –                                                     | 204                    | 1229                   | 5.6                    | 1.3       | 0.3       | pneumo                           | sinusitis                                                                   | none                                                             | N/A              |
| 39      | 66                    | 67                    | F   | CVID               | Y                        | PNL                                                   | 161                    | 539                    | 3.5                    | 0.6       | 0.2       | N/A                              | bronchitis, bronchiectasis, asthma                                          | none                                                             | N/A              |
| 40      | 73                    | 66                    | F   | CVID               | Y                        | –                                                     | 154                    | 1345                   | 3.3                    | 0.3       | 0.3       | N/A                              | sinusitis, asthma/COPD, bronchiectasis                                      | none                                                             | N/A              |
| 41      | 77                    | 68                    | F   | CVID               | Y                        | PNL                                                   | 70                     | 553                    | 4.2                    | 0.8       | 1.9       | diphtheria                       | systemic viral infection, bronchiectasis, ILD                               | solid organ malignancy, auto-immunity                            | Y                |
| 42      | 82                    | 68                    | M   | CVID               | Y                        | –                                                     | 13                     | 727                    | 9.8*                   | 0.6       | 0.2       | N/A                              | otitis, sinusitis, pneumonia, bronchiectasis                                | cytopenia                                                        | N                |
| 43      | 27                    | 4                     | M   | HGG                | Y                        | –                                                     | 148                    | 742                    | 10.8*                  | 1.8       | 1.3       | N/A                              | pneumonia                                                                   | none                                                             | N/A              |
| 44      | 29                    | 21                    | F   | HGG                | Y                        | –                                                     | 144                    | 1982                   | 5.2                    | 0.3       | 0.5       | normal                           | asthma/COPD                                                                 | none                                                             | N/A              |
| 45      | 31                    | 27                    | F   | HGG                | Y                        | –                                                     | 361                    | 983                    | 5.6                    | 0.3       | 1.3       | normal                           | sinusitis, systemic viral infection, giardia                                | enteropathy                                                      | Y                |
| 46      | 40                    | 40                    | F   | HGG                | N                        | –                                                     | 202                    | 1038                   | 5.2                    | 1.5       | 0.9       | normal                           | sinusitis, pneumonia                                                        | none                                                             | N/A              |
| 47      | 43                    | 42                    | F   | HGG                | Y                        | –                                                     | 116                    | 1554                   | 4.2                    | 3.2       | 0.6       | pneumo                           | sinusitis, pneumonia                                                        | inflammatory tracheal stenosis                                   | Y                |
| 48      | 45                    | 45                    | F   | HGG                | Y                        | –                                                     | 570                    | 2029                   | 11*                    | 3.7       | 1.6       | normal                           | otitis, sinusitis, pneumonia, asthma/COPD, pulmonary nocardia & aspergillus | none                                                             | N/A              |
| 49      | 52                    | 50                    | F   | HGG                | N                        | –                                                     | 193                    | 1329                   | 5.2                    | 0.8       | 1.3       | pneumo                           | sinusitis, pneumonia                                                        | none                                                             | N/A              |
| 50      | 52                    | 47                    | M   | HGG                | Y                        | –                                                     | 195                    | 473                    | 3.2                    | 0.3       | 0.2       | Hib                              | sinusitis, pneumonia                                                        | none                                                             | N/A              |
| 51      | 55                    | 54                    | F   | HGG                | N <sup>#</sup>           | –                                                     | 215                    | 1362                   | 4.1                    | 0.4       | 0.8       | normal                           | pneumonia                                                                   | inflammatory tenosynovitis                                       | Y                |



| Patient | Age at inclusion (yr) | Age at diagnosis (yr) | Sex | Clinical Diagnosis | IgRT at time of sampling | anti-inflammatories within 4-6 months prior to sampling | B-cells/ $\mu$ l blood | T-cells/ $\mu$ l blood | IgG at inclusion (g/L) | IgA (g/L)      | IgM (g/L)  | Impaired vaccination responses | Infectious complications                            | Non-infectious complications          | NIC at diagnosis |
|---------|-----------------------|-----------------------|-----|--------------------|--------------------------|---------------------------------------------------------|------------------------|------------------------|------------------------|----------------|------------|--------------------------------|-----------------------------------------------------|---------------------------------------|------------------|
| 52      | 60                    | 59                    | F   | HGG                | Y                        | –                                                       | 119                    | 1408                   | <b>5.9</b>             | <b>0.7</b>     | 1.3        | not done                       | sinusitis, otitis, pneumonia                        | Hashimoto's thyroiditis               | Y                |
| 53      | 67                    | 61                    | F   | HGG                | Y                        | –                                                       | 191                    | 1844                   | <b>4.6</b>             | <b>0.6</b>     | 2.9        | diphtheria                     | sinusitis, pneumonia, asthma/COPD                   | enteropathy, autoimmunity             | Y                |
| 54      | 68                    | 68                    | F   | HGG                | N <sup>#</sup>           | –                                                       | 266                    | 1157                   | <b>5.6</b>             | 1.7            | 0.9        | pneumo                         | pneumonia, sinusitis                                | none                                  | N/A              |
| 55      | 79                    | 74                    | F   | HGG                | Y                        | –                                                       | <b>81</b>              | <b>706</b>             | <b>4</b>               | 1.1            | 1.5        | pneumo                         | sinusitis, bronchiectasis, osteomyelitis, pertussis | breast carcinoma, polymyalgia, asthma | Y                |
| 56      | 42                    | 35                    | M   | IGSCD              | N                        | –                                                       | 477                    | 1796                   | 6.9                    | <b>0.6</b>     | 1.1        | normal                         | bronchitis                                          | none                                  | N/A              |
| 57      | 19                    | 19                    | F   | SpAD               | N <sup>#</sup>           | –                                                       | <b>92</b>              | 2090                   | 11.1                   | <b>&lt;0.1</b> | 0.9        | pneumo                         | sinusitis, bronchitis, tonsillitis                  | none                                  | N/A              |
| 58      | 21                    | 20                    | M   | SpAD               | N                        | –                                                       | 192                    | 1209                   | 9.4                    | 0.9            | 1.1        | pneumo                         | sinusitis                                           | none                                  | N/A              |
| 59      | 41                    | 35                    | M   | SpAD               | Y                        | CT                                                      | 236                    | 1894                   | 8.2*                   | 2.1            | <b>0.3</b> | pneumo                         | otitis, sinusitis, asthma/COPD                      | none                                  | N/A              |
| 60      | 57                    | 58                    | F   | SpAD               | N <sup>#</sup>           | HCQ                                                     | 252                    | 1087                   | <u>32*</u>             | 3              | 0.5        | pneumo                         | pneumonia                                           | SLE/Sjögren's                         | Y                |
| 61      | 66                    | 65                    | F   | SpAD               | N <sup>#</sup>           | –                                                       | 323                    | 957                    | 10.3                   | <b>&lt;0.1</b> | 0.9        | poor                           | pneumonia, bronchitis                               | none                                  | N/A              |
| 62      | 72                    | 72                    | F   | SpAD               | N <sup>#</sup>           | –                                                       | 119                    | 1413                   | 12                     | 1.8            | 0.7        | poor                           | pneumonia, bronchiectasis, MAC, pseudomonas         | none                                  | N/A              |

Values below normal range are depicted in **bold** font and above normal range underlined. Reference ranges: IgG, 6.1-16.2g/L; IgA, 0.85-4.99g/L; IgM, 0.35-2.42g/L; B cells, 97-614 cells/ $\mu$ l; T cells, 823-2430 cells/ $\mu$ l. (Reference ranges represent the 5<sup>th</sup> and 95<sup>th</sup> percentiles from our healthy controls).

<sup>#</sup> Ig replacement commenced after inclusion in this study; \* IgG measurement after start of Ig replacement therapy; ^leukemia diagnosed post inclusion (van Zelm et al., 2019); agamma, agammaglobulinemia; CVID, common variable immunodeficiency; HGG, hypogammaglobulinemia; IGSC, IgG subclass deficiency; SpAD, specific antibody deficiency; XLA, X-linked agammaglobulinemia (genetically diagnosed see **Supplementary Table 6**), IgRT, immunoglobulin replacement therapy; CT, cortisone; HCT, hydrocortisone; HCQ, hydroxychloroquine; PNL, prednisolone; MAC, Mycobacterium Avium complex; pneumo, pneumococcal; SLE, systemic lupus erythematosus.

**Supplementary Table 7: Molecular diagnosis of XLA patients.**

| Family | Patient | Gene       | Mutation (DNA) | location    | Effect (protein) |
|--------|---------|------------|----------------|-------------|------------------|
| A      | 1       | <i>BTK</i> | c.1257delG     | Exon 14     | p.G419GfsX11     |
|        | 2       | <i>BTK</i> | c.1257delG     | Exon 14     | p.G419GfsX11     |
|        | 3       | <i>BTK</i> | c.1257delG     | Exon 14     | p.G419GfsX11     |
|        | 4       | <i>BTK</i> | c.1257delG     | Exon 14     | p.G419GfsX11     |
|        | 6       | <i>BTK</i> | c.1257delG     | Exon 14     | p.G419GfsX11     |
|        | B       | 5 *        | <i>BTK</i>     | c.1908+1G>C | Exon 18          |
| C      | 7       | <i>BTK</i> | c.862C>T       | Exon 10     | p.R288W          |
| D      | 8       | <i>BTK</i> | c.1559G>A      | Exon 15     | p.R520Q          |
| E      | 9       | <i>BTK</i> | c.1787+71C>T   | Intron 16   | p.A523V fsX5     |

\*Patient presented with B-ALL 6 months after inclusion in this study and was reported in (van Zelm et al., 2019)

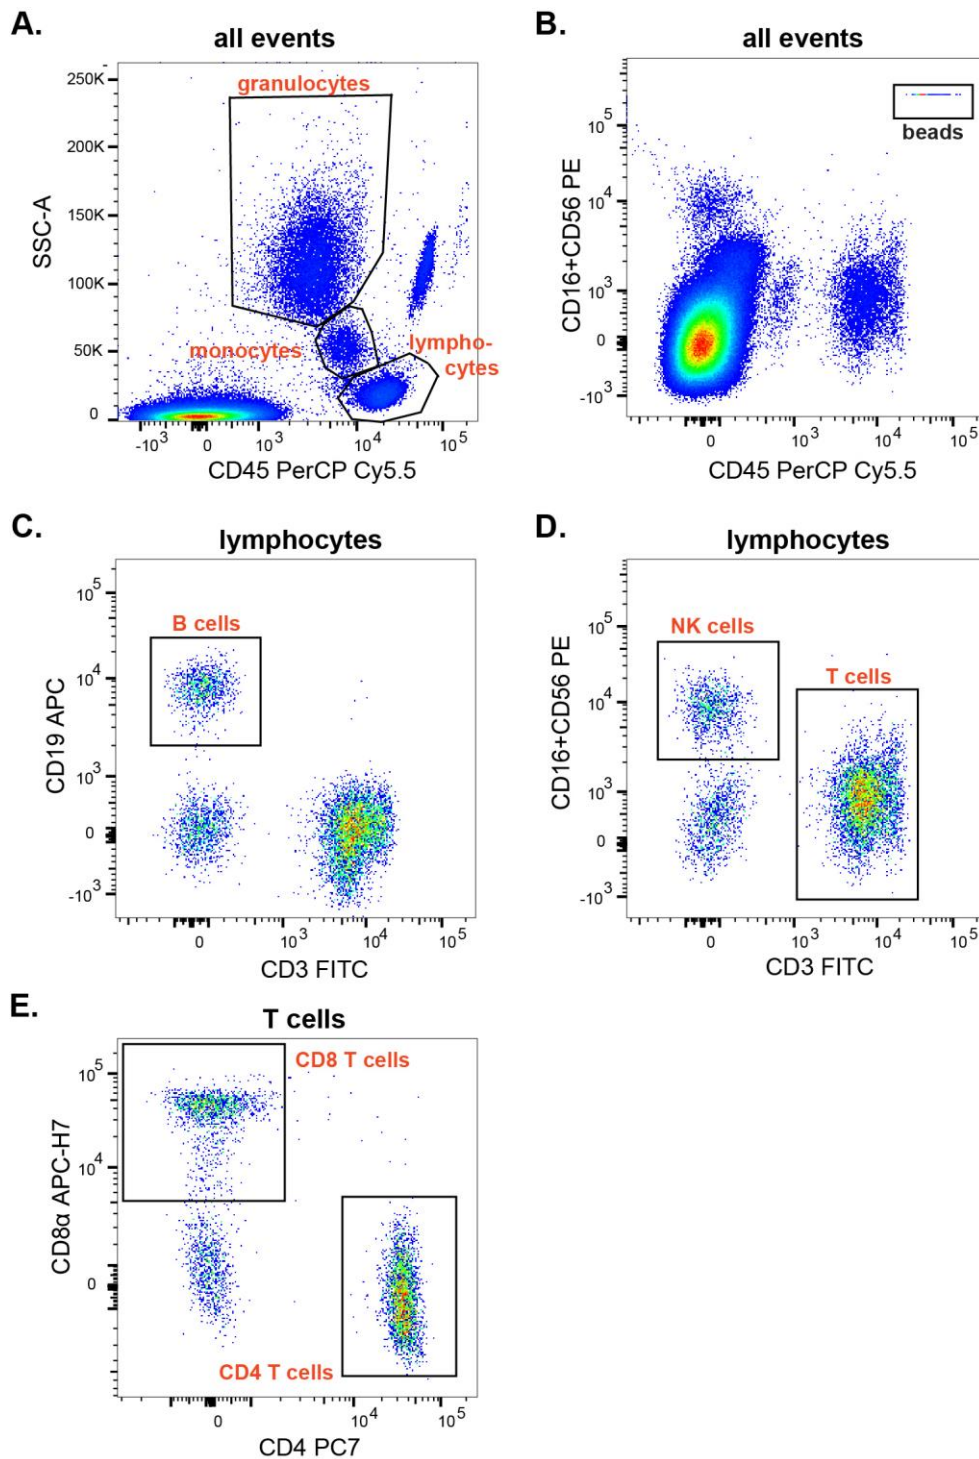

**Supplementary Figure 1. Gating strategy for TruCount tube.** **A.** Gating of major leukocyte subsets, and **B.** beads within all events. **C.** Gating of CD19<sup>+</sup> B cells within the lymphocyte gate. **D.** Gating of CD16/56<sup>+</sup> NK cells and CD3<sup>+</sup> T cells within the lymphocyte gate. **E.** Gating of CD4 T cells and CD8 T cells within the total T cell gate.

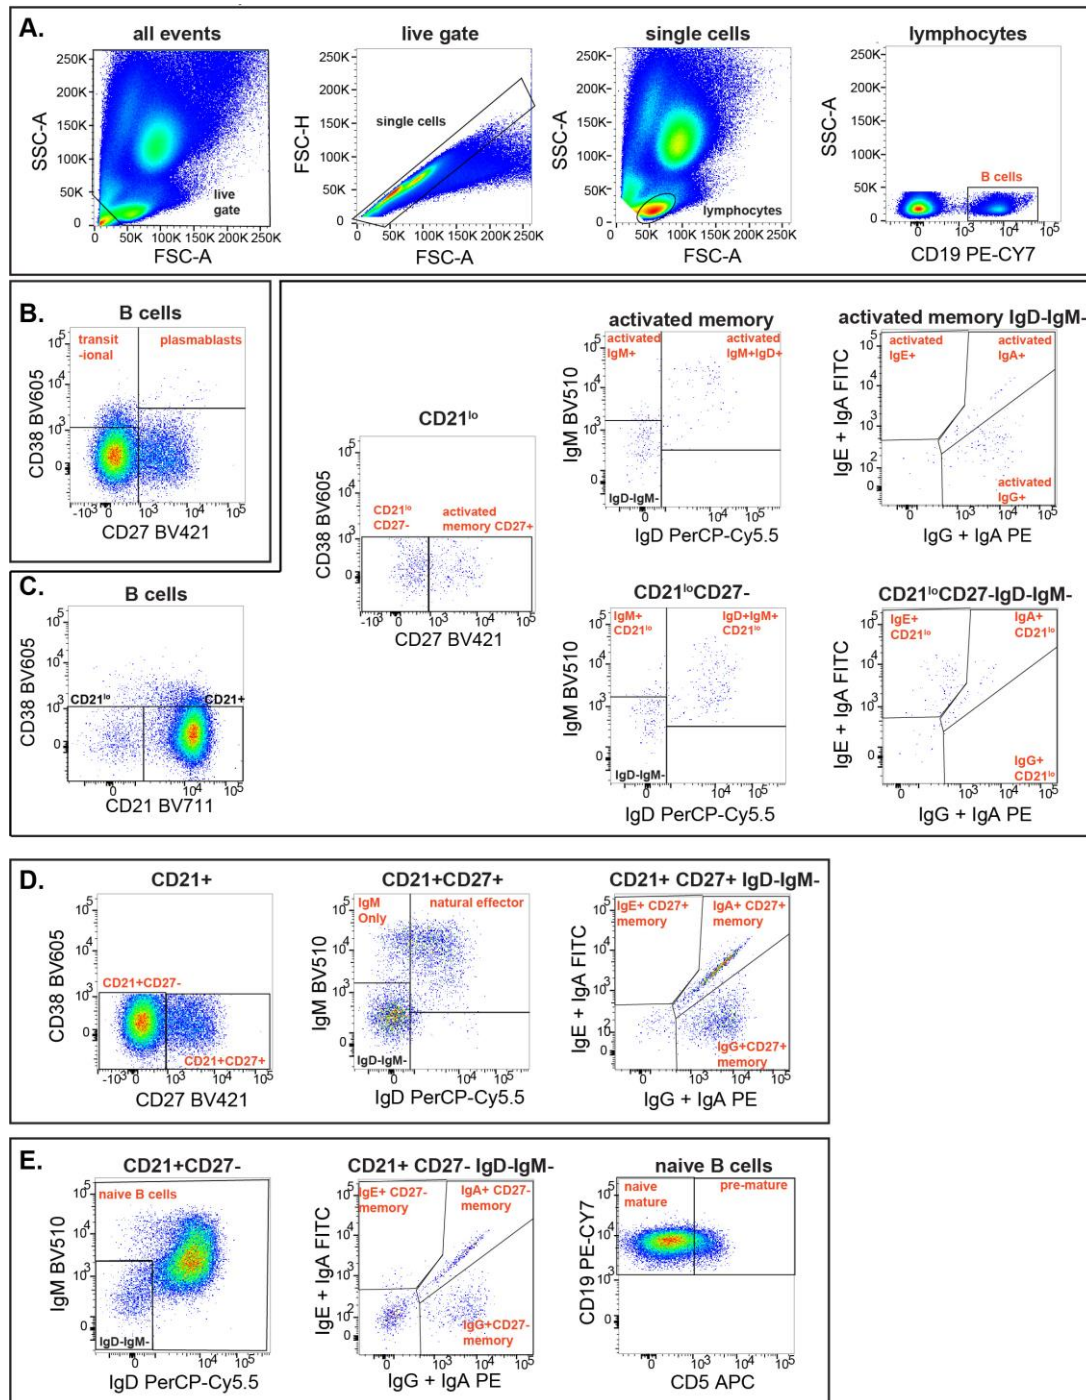

**Supplementary Figure 2. Gating strategy for the B-cell tube.** **A.** Gating strategy to define total CD19<sup>+</sup> B cells. **(B)** Transitional B cells and plasmablasts are delineated from B cells. **C.** In parallel, B cells are gated based on dim expression CD38 and divided into CD21<sup>lo</sup> or CD21<sup>+</sup> B cells. CD21<sup>+</sup> gated in **C.** are subdivided into **D.** CD21<sup>+</sup>CD27<sup>+</sup> and **E.** CD21<sup>+</sup>CD27<sup>-</sup>. **D.** CD21<sup>+</sup>CD27<sup>+</sup> cells are assessed according to their expression of IgD and IgM to delineate IgM only and natural effector cells. The IgD-IgM<sup>-</sup> cells are further characterized according to IgA, IgE and IgG expression into IgE<sup>+</sup>CD27<sup>+</sup> memory, IgA<sup>+</sup>CD27<sup>+</sup> memory and IgG<sup>+</sup>CD27<sup>+</sup> memory. **E.** CD21<sup>+</sup>CD27<sup>-</sup> cells are subdivided according to CD27 expression into naive B cells and IgD-IgM<sup>-</sup>. The IgD-IgM<sup>-</sup> are subsequently assessed for IgA, IgG and IgE expression to delineate IgE<sup>+</sup>CD27<sup>-</sup> memory, IgA<sup>+</sup>CD27<sup>-</sup> memory and IgG<sup>+</sup>CD27<sup>-</sup> memory subsets. Naive B cells are assessed for CD5 expression to delineate pre-naive and naive mature B cells.

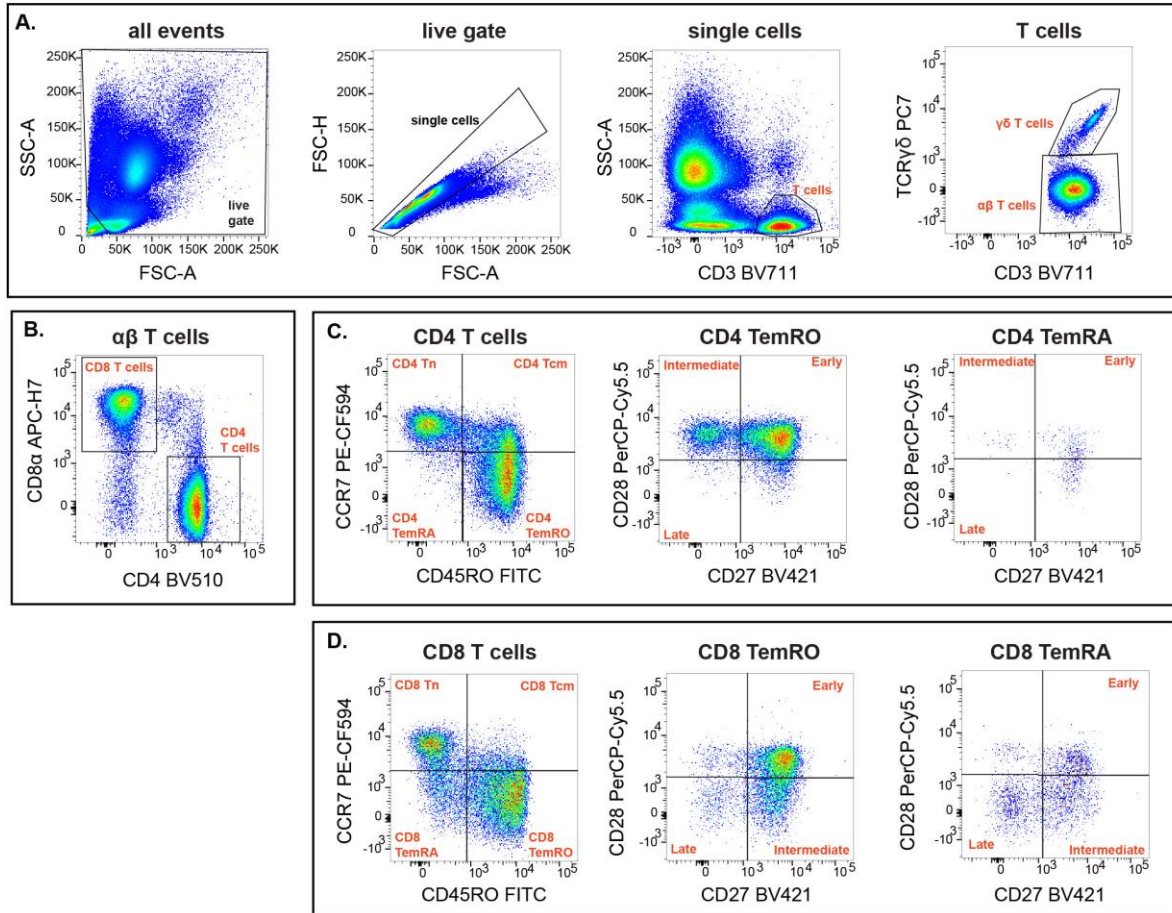

**Supplementary Figure 3. Gating strategy for T Effector tube.** **A.** Gating strategy to define total,  $\gamma\delta$  T cells and  $\alpha\beta$  T cells, **B.**  $\alpha\beta$  CD4 and CD8 T cells. **C.** Gating of CD4 T cells into naive (CD4 Tn) and memory (CD4 Tcm, TemRO and TemRA) T cell subsets, followed by subsetting CD4 TemRO and TemRA into early (CD27<sup>+</sup>CD28<sup>+</sup>), intermediate (CD27<sup>-</sup>CD28<sup>+</sup>) and late (CD27<sup>-</sup>CD28<sup>-</sup>) stage. **D.** Gating of CD8 T cells into naive (CD8 Tn) and memory (CD8 Tcm, TemRO and TemRA) T cell subsets, followed by subsetting CD8 TemRO and TemRA into early (CD27<sup>+</sup>CD28<sup>+</sup>), intermediate (CD27<sup>+</sup>CD28<sup>-</sup>) and late (CD27<sup>-</sup>CD28<sup>-</sup>) stage.

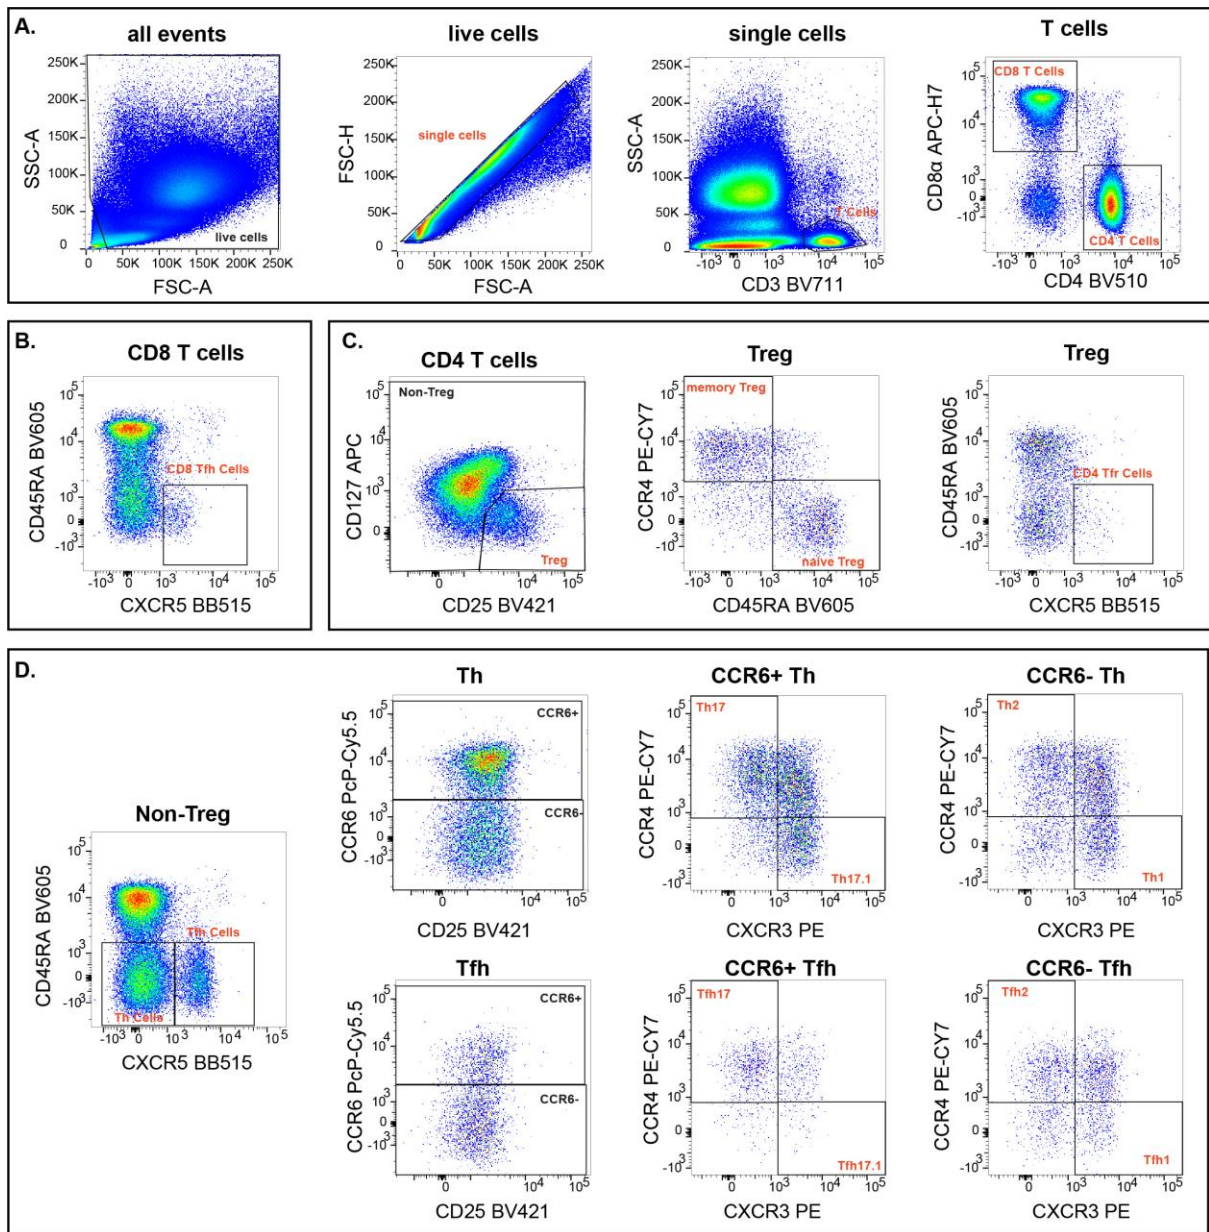

**Supplementary Figure 4. Gating strategy for T helper cell tube.** **A.** Gating strategy to define total CD4 and CD8 T cells. **B.** CD8 Tfh T cells are gated within the CD8 T cell gate defined in A. **C.** Tregs (CD25<sup>hi</sup>CD127<sup>lo</sup>) and non-Tregs are defined within the CD4 T cell gate. Tregs are further separated into naive and memory Tregs and Tfr. **D.** Non-Tregs are subdivided into Th (CXCR5<sup>-</sup>CD45RA<sup>-</sup>) and Tfh (CXCR5<sup>+</sup>CD45RA<sup>-</sup>). Th cells are further split into CCR6<sup>+</sup> and CCR6<sup>-</sup> with each population further delineated using CXCR3 and CCR4 expression, resulting in the gating of four Th subpopulations Th1, Th2, Th17 and Th17.1. Tfh are subdivided into CCR6<sup>+</sup> and CCR6<sup>-</sup> with each of these populations further subdivided to yield Tfh1, Tfh2, Tfh17 and Tfh17.1.

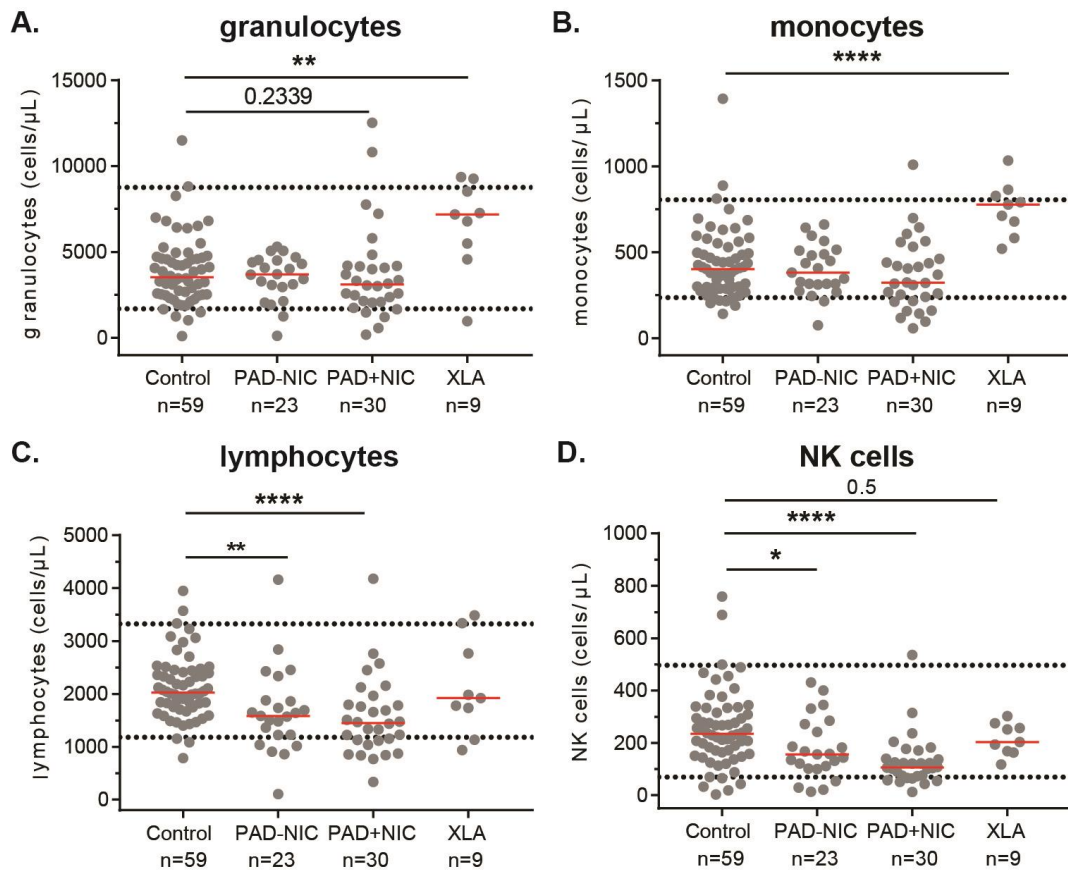

**Supplementary Figure 5. Lymphocyte and NK cell numbers are significantly reduced in PAD patients.** Absolute numbers of **A.** Granulocytes, **B.** Monocytes, **C.** Lymphocytes and **D.** NK cells. Gating strategy is outlined in *Suppl Figure 1* and *Suppl Table 3*. Horizontal dotted lines represent the 5<sup>th</sup> and 95<sup>th</sup> percentiles from the healthy control group. PAD, predominantly antibody deficiency; NIC, non-infectious complications. Statistics were performed using the Kruskal-Wallis test, followed by Mann-Whitney tests for pairwise comparisons. \* $P < 0.05$ , \*\* $P < 0.01$ , \*\*\* $P < 0.001$ , and \*\*\*\* $P < 0.0001$ .

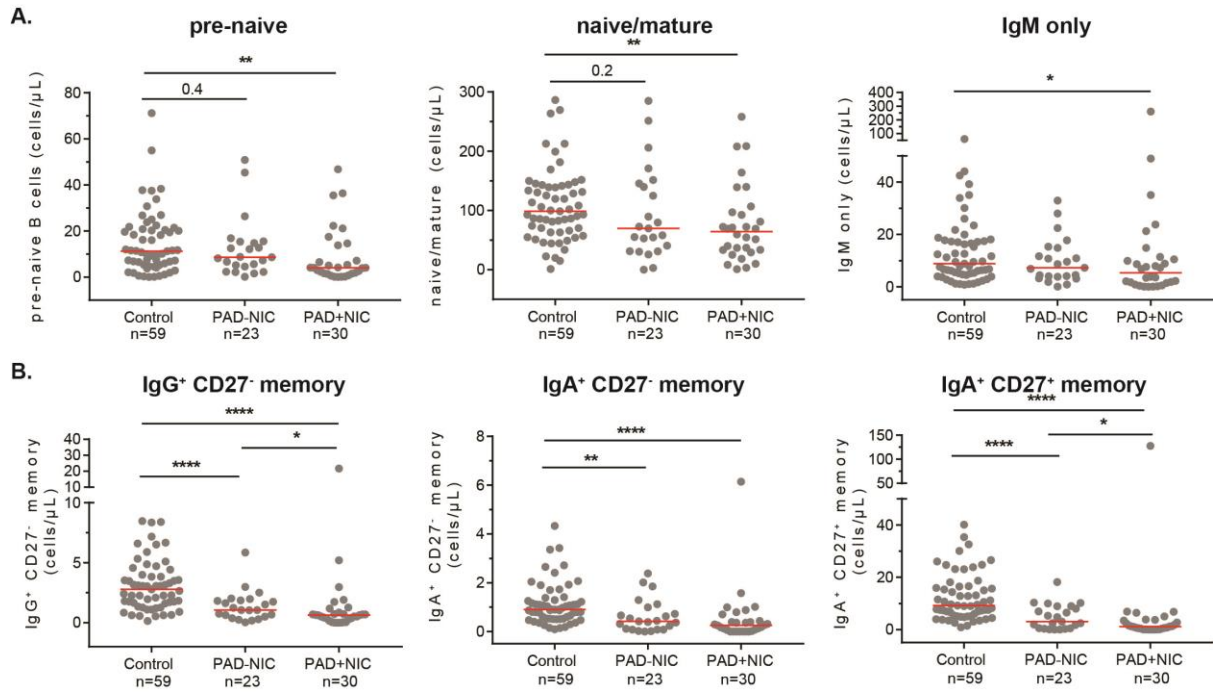

**Supplementary Figure 6. Reduced naive and memory B cells in PAD patients.** Absolute numbers of **A.** pre-naive, naive mature and IgM memory, **B.** IgG<sup>+</sup> CD27<sup>-</sup>, IgA<sup>+</sup> CD27<sup>-</sup> and IgA<sup>+</sup> CD27<sup>+</sup> memory B cells. Subsets delineated as in *Suppl Figure 2* and *Suppl Table 3*. PAD, predominantly antibody deficiency; NIC, non-infectious complications. Statistics were performed using a two-way ANOVA, followed by a Mann-Whitney test. \*P<0.5, \*\*P<0.01, \*\*\*P<0.001, and \*\*\*\*P<0.0001.



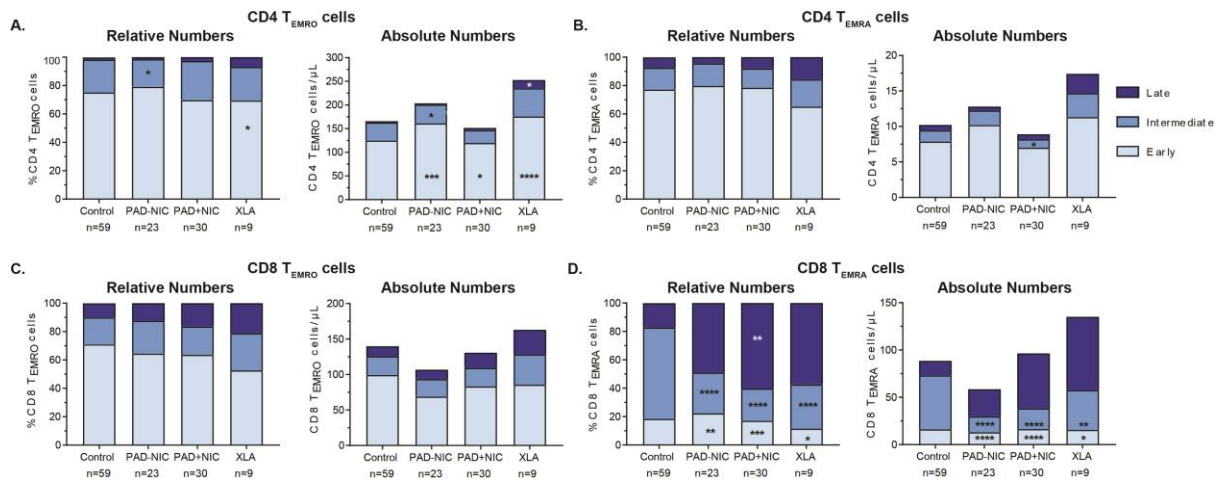

**Supplementary Figure 7. Altered early, intermediate and late T<sub>EMRO</sub> and T<sub>EMRA</sub> cells in PAD patients.** Relative and absolute numbers of CD4 (A) TemRO and (B) TemRA subsets: early (CD27<sup>+</sup>CD28<sup>+</sup>), intermediate (CD27<sup>-</sup>CD28<sup>+</sup>) and late (CD27<sup>-</sup>CD28<sup>-</sup>) stages. Relative and absolute numbers of CD8 (C) TemRO and (D) TemRA subsets: early (CD27<sup>+</sup>CD28<sup>+</sup>), intermediate (CD27<sup>+</sup>CD28<sup>-</sup>) and late (CD27<sup>-</sup>CD28<sup>-</sup>) stages. Subsets delineated as in *Suppl Figure 3* and *Suppl Table 3*. PAD, predominantly antibody deficiency; NIC, non-infectious complications. Statistics were performed using a two-way ANOVA, followed by a Mann-Whitney test. \*P<0.5, \*\*P<0.01, \*\*\*P<0.001, and \*\*\*\*P<0.0001.
